# Supplementary material
Source: PubMed Central journal article supplement (PMC6289653)
Supplement: NIHMS1507374-supplement-2.pdf [file NIHMS1507374-supplement-2.pdf]

**Supplementary Table 1.** The assembly quality of contig clusters generated by MaxBin for three species in synthetic data set.

| <b>Species</b>               | <b>Completeness</b> | <b>Contamination</b> | <b>N50</b> | <b>#contigs</b> |
|------------------------------|---------------------|----------------------|------------|-----------------|
| <i>Lactobacillus gasseri</i> | 98.4%               | 0                    | 74,718     | 55              |
| <i>Enterococcus faecalis</i> | 99.6%               | 0.4%                 | 41,628     | 131             |
| <i>Citrobacter rodentium</i> | 100%                | 14.9%                | 26,428     | 1,034           |

**Supplementary Table 2.** Comparison of accuracy of inference of relative distance of contigs to the replication origin using DEMIC (correlation between PC1 and true distances) and direct sorting of contigs in single sample (average of correlations between single sample estimated distances and true distances). Also presented in the table are the average variance of coverage across samples (average over contigs after filtering) and across contigs (average over samples) in synthetic data sets.

| <b>Species</b>               | <b>DEMIC</b> | <b>Single sample</b> | <b>Aver. var samples</b> | <b>Aver. var contigs</b> |
|------------------------------|--------------|----------------------|--------------------------|--------------------------|
| <i>Lactobacillus gasseri</i> | 0.902        | 0.846<br>(n=36)      | 5.51<br>(n=29)           | 0.10<br>(n=36)           |
| <i>Enterococcus faecalis</i> | 0.948        | 0.915<br>(n=36)      | 3.7<br>(n=72)            | 0.09<br>(n=36)           |
| <i>Citrobacter rodentium</i> | 0.964        | 0.756<br>(n=50)      | 0.73<br>(n=144)          | 0.15<br>(n=50)           |

**Supplementary Table 3.** The assembly quality and marker lineage of seven contig clusters with different growth rates in healthy and Crohn's disease samples of PLEASE data set.

| <b>Contig cluster</b> | <b>Completeness</b> | <b>Contamination</b> | <b>Control vs. Crohn's</b> | <b>Marker lineage</b>     |
|-----------------------|---------------------|----------------------|----------------------------|---------------------------|
| metabat2.187          | 61.7%               | 0                    | High                       | <i>k__Bacteria</i>        |
| metabat2.239          | 58.5%               | 1.8%                 | High                       | <i>o__Clostridiales</i>   |
| metabat2.250          | 66.6%               | 0.8%                 | High                       | <i>p__Proteobacteria</i>  |
| metabat2.259          | 79.3%               | 2.1%                 | High                       | <i>k__Bacteria</i>        |
| metabat2.270          | 72.0%               | 2.0%                 | High                       | <i>f__Lachnospiraceae</i> |
| metabat2.369          | 68.8%               | 2.8%                 | High                       | <i>f__Lachnospiraceae</i> |
| metabat2.55           | 55.2%               | 1.9%                 | Low                        | <i>o__Clostridiales</i>   |
